# Supplementary material
Source: MDPI journal article supplement (https://www.mdpi.com/2297-8739/10/7/417)
Supplement: s1 [file s1]

## Article

# ENANTIOMERIC SEPARATION OF SYNTHETIC CATHINONES BY CAPILLARY ELECTROPHORESIS WITH IONIC LIQUID AND CYCLODEXTRIN BUFFER CO-ADDITIVES

Jennifer Buchanan Roberts <sup>1,2</sup> and Christa L. Colyer <sup>1,\*</sup>

<sup>1</sup> Wake Forest University, Department of Chemistry, Winston-Salem, NC 27109 USA

<sup>2</sup> Current address: Mars Hill University, Mars Hill, NC 28754

\* Correspondence: colyercl@wfu.edu

## Supplementary Information:

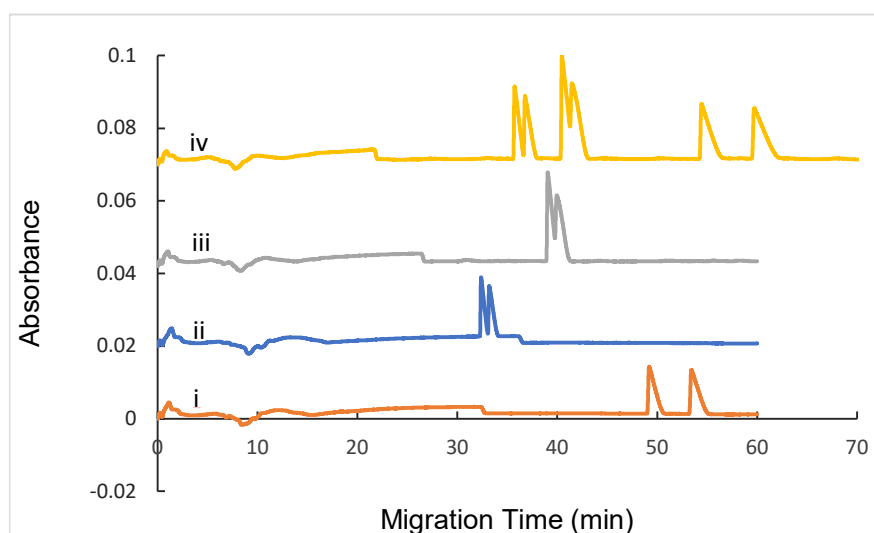

**Figure S1.** Electropherograms of pentylone (i, orange trace), methylone (ii, blue trace), 4-MEC (iii, gray trace), and mixture of all three 2° amine synthetic cathinones (iv, yellow trace, migration order: methylone, 4-MEC, pentylone), employing higher TBAC concentration (100 mM TBAC) with 12 mM  $\beta$ -CD co-additives in 50 mM ammonium formate buffer (pH 3.1). A Beckman P/ACE MDQ CE was used with an applied voltage of 20 kV. Capillary inner diameter was 50  $\mu$ m with effective and total lengths of 50 cm and 60 cm, respectively. The injection volume was 5 nL (5 sec at 0.5 psi). Electropherograms are offset vertically for clarity. Note: The migration times of tertiary synthetic cathinones (MDPBP, MDPV, and naphyrone) exceeded 120 minutes in this high TBAC concentration buffer system, and hence are not included here.

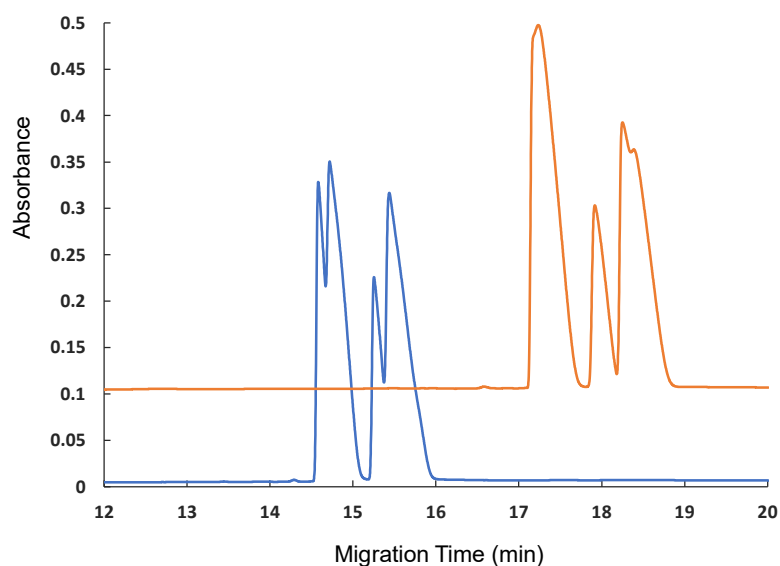

**Figure S2.** Electropherograms of a mixture of six synthetic cathinones (MDPV, MDPBP, naphyrone, pentylone, methylone, and 4-MEC) at 1 mg/mL each, employing a separation buffer consisting of 150 mM phosphate (pH 6.1) with 1% acetonitrile as modifier (lower, blue trace), or with 10 mM phytic acid as modifier (upper, orange trace). A Beckman P/ACE MDQ CE was used with an applied voltage of 20 kV and a capillary of inner diameter 50  $\mu$ m and effective and total lengths of 50 cm and 60 cm, respectively. The injection volume was 5 nL (5 sec at 0.5 psi). Electropherograms are offset vertically for clarity.
